# Supplementary material for: Arabidopsis mutants impaired in glutathione biosynthesis exhibit higher sensitivity towards the glucosinolate hydrolysis product allyl-isothiocyanate
Source: PubMed Central journal article supplement (PMC6023892; doi:10.1038/s41598-018-28099-1), 2018-06-28
Supplement: 41598_2018_28099_MOESM1_ESM.pdf [file 41598_2018_28099_MOESM1_ESM.pdf]

**Arabidopsis mutants impaired in glutathione biosynthesis exhibit higher sensitivity towards the glucosinolate hydrolysis product allyl-isothiocyanate**

**János Urbancsok, Atle M Bones & Ralph Kissen\***

Cell, Molecular Biology and Genomics Group, Department of Biology, Norwegian University of Science and Technology, NO-7491 Trondheim, Norway

\* corresponding author

Ralph Kissen

E-mail: [ralph.kissen@bio.ntnu.no](mailto:ralph.kissen@bio.ntnu.no)

Tel.: (+47) 73596229

**Supplementary Figure S1.** The ratio between the mean root length under a given AITC concentration and that of the control treatment calculated for 10 day old seedlings of the Col-0 WT and the glutathione mutants (A) *cad2-1*, (B) *zir1*, (C) *nrc1*, (D) *nrc2*.

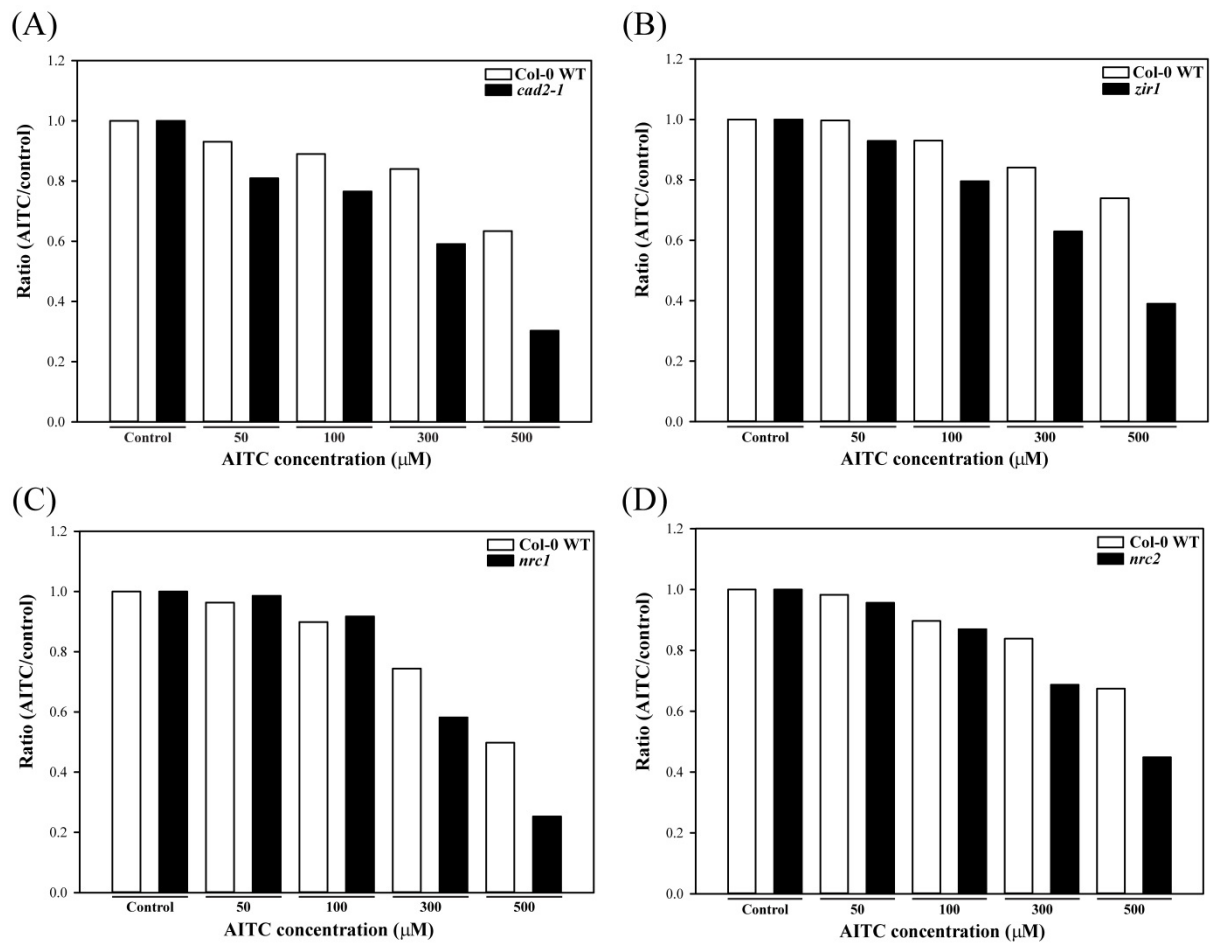

**Supplementary Figure S2.** Root elongation analysis over time using WT and glutathione mutants grown either on control medium or on medium supplemented with 300  $\mu$ M AITC: (A) *pad2-1*, (B) *cad2-1*, (C) *zir1*, (D) *nrc1* and (E) *nrc2*. Root lengths were measured (n= 48 for mutants; n= 96 for WT) at each time point (at day 4, 7 and 10) and the mean values were used to calculate the average root length increment. Note that the values for WT are identical for each of the panels as all seedlings were grown in parallel.

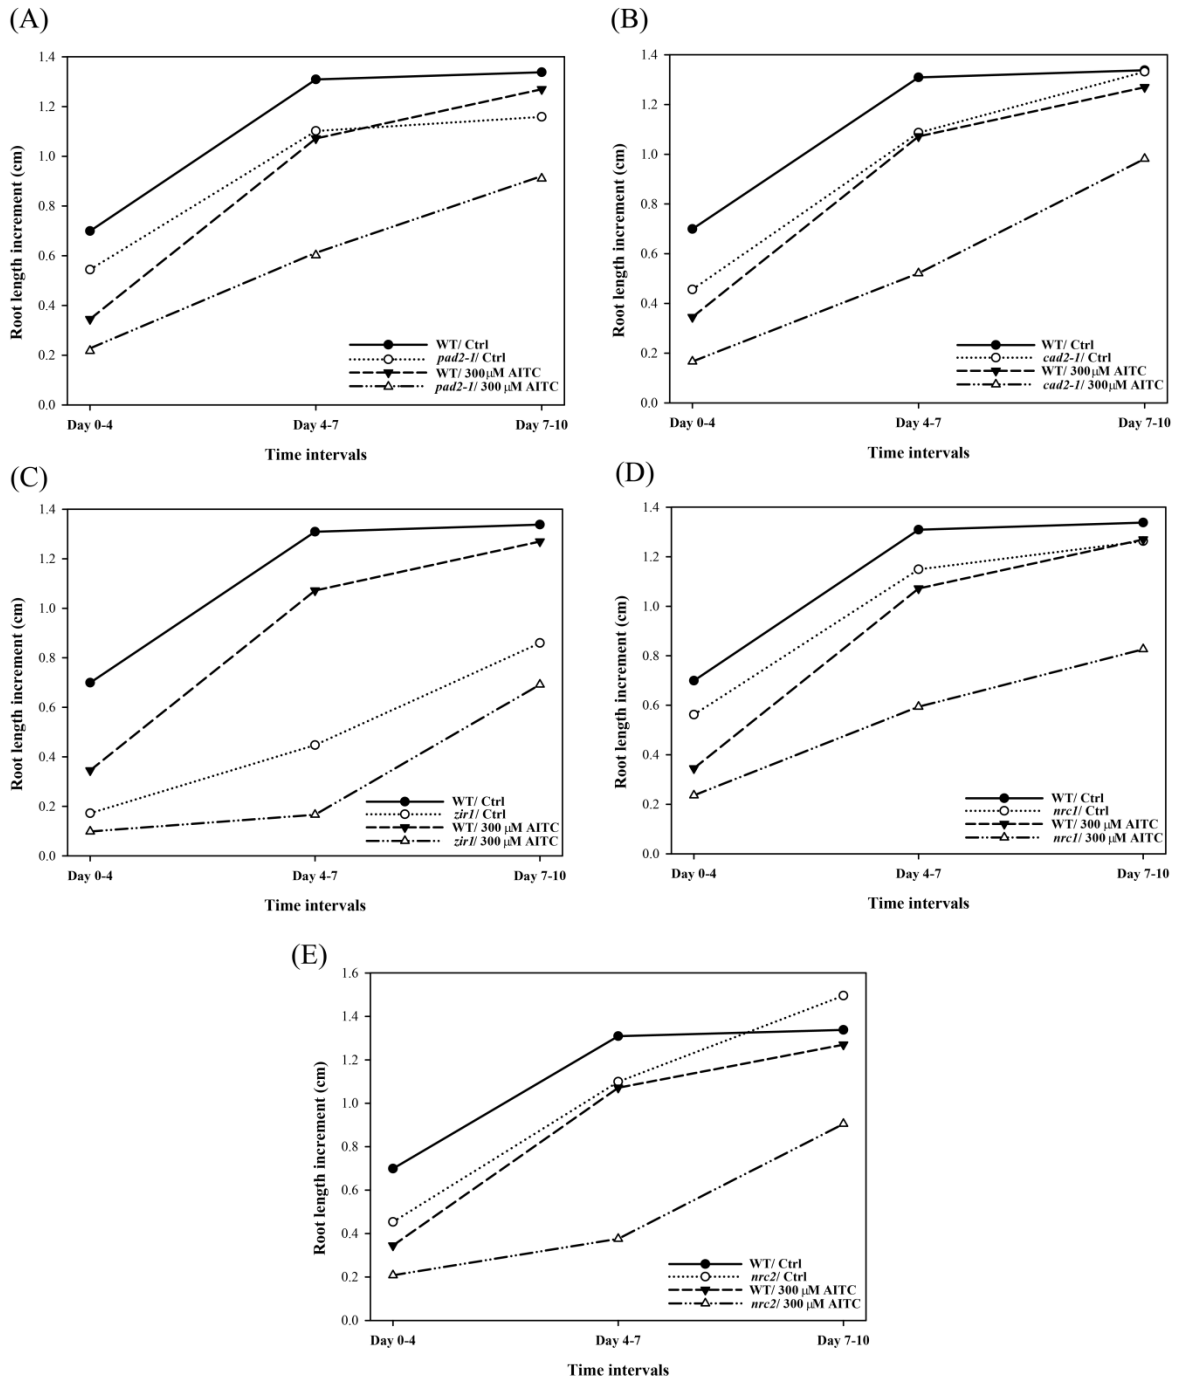

**Supplementary Figure S3.** The ratio between the mean biomass under a given AITC concentration and that of the control treatment calculated for 10 day old seedlings of the Col-0 WT and the glutathione mutants (A) *cad2-1*, (B) *zir1*, (C) *nrc1*, (D) *nrc2*.

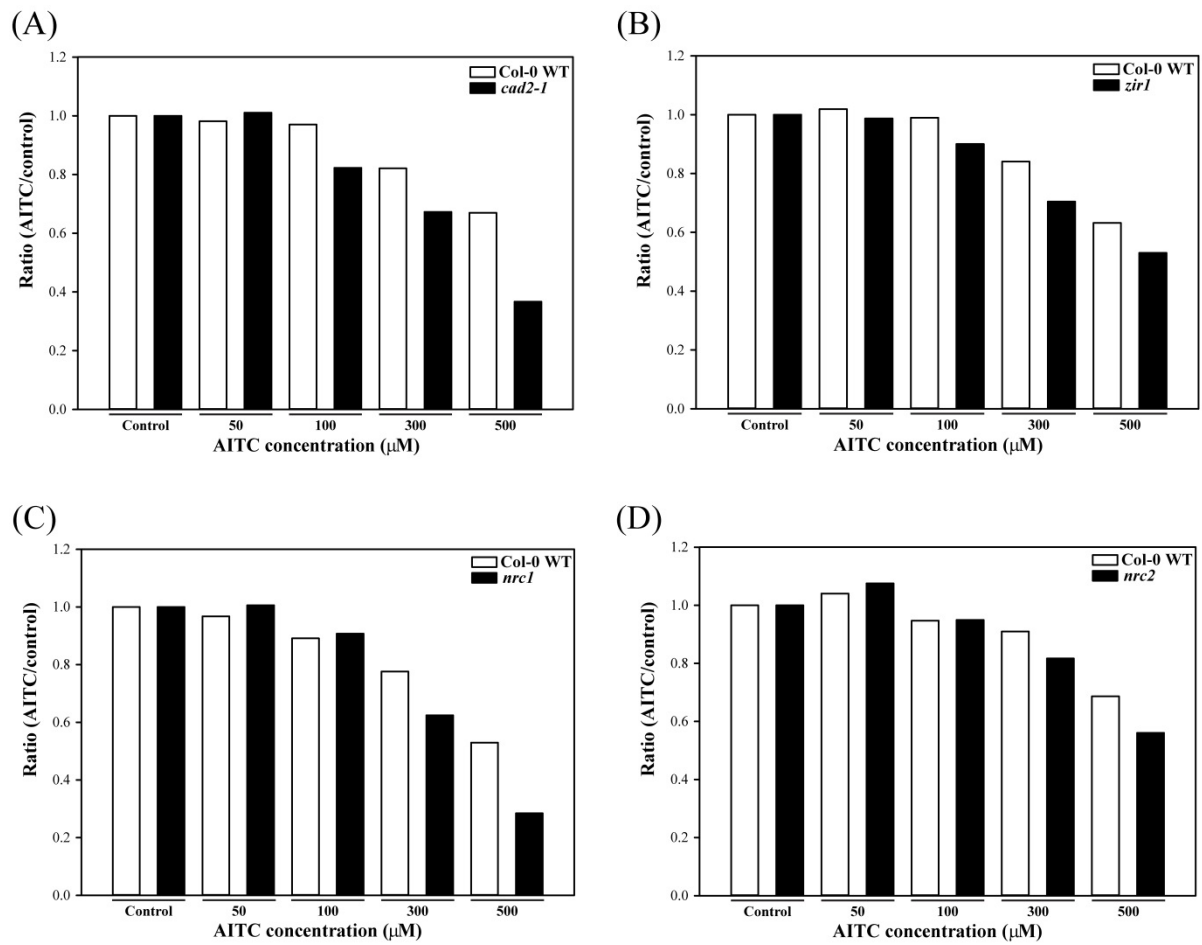

**Supplementary Figure S4.** Ratios of (A) mean root length and (B) mean biomass between a given treatment (AITC, BSO or AITC+BSO) and that of the control treatment calculated for 10 day old seedlings of the Col-0 WT and the glutathione mutant *pad2-1*.

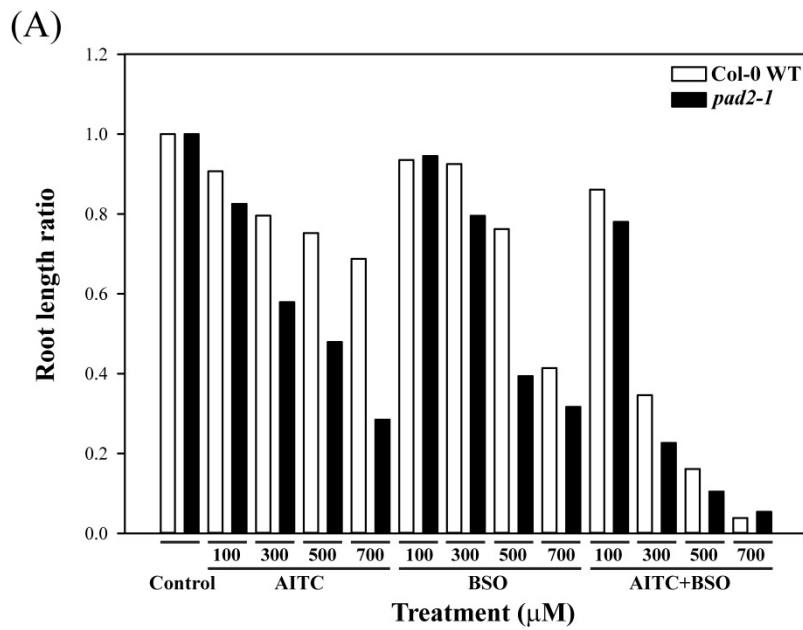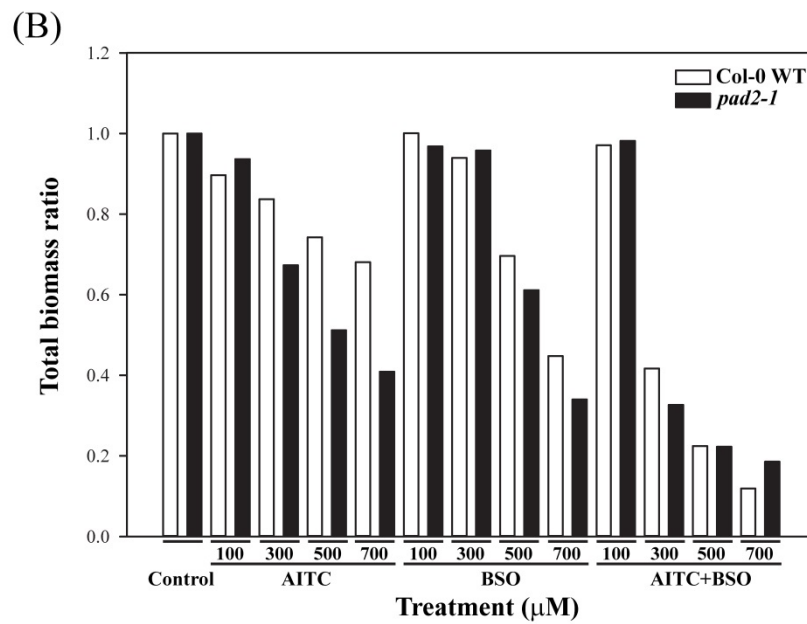

**Supplementary Figure S5.** Genotyping results of mutants used in this study (see also Supplementary Table S1) performed as described in more detail in the Methods section using the primers listed in Supplementary Table S2.

(A) *GSH1* deficient mutants *pad2-1*, *cad2-1*, *zir1* and *nrc1*

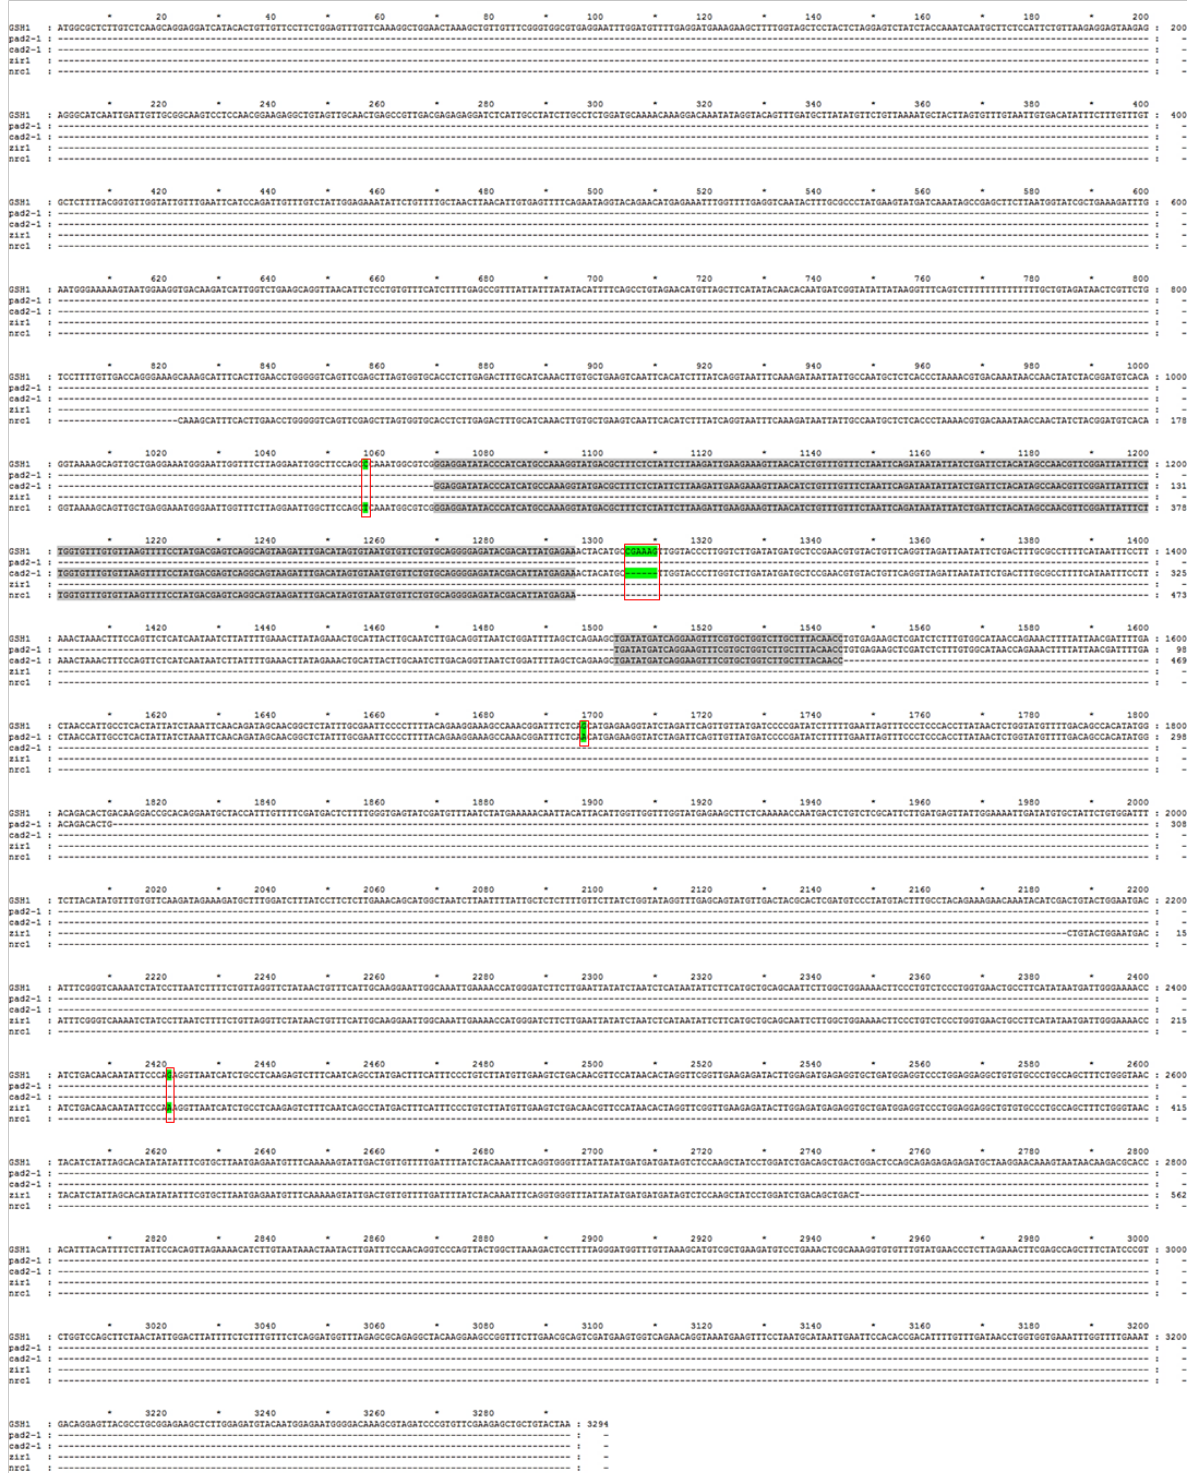



(C) *ggp1-1* (GK-319F10)

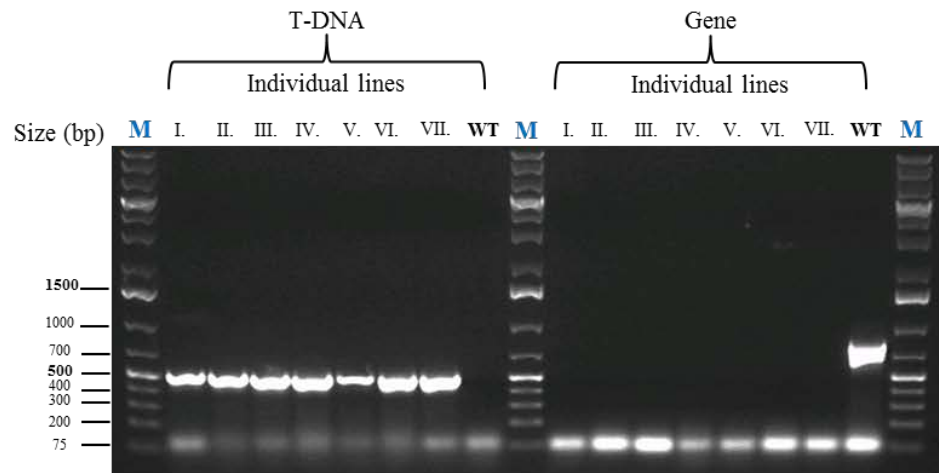

(D) *ggt1-1* (SAIL\_1178\_C01)

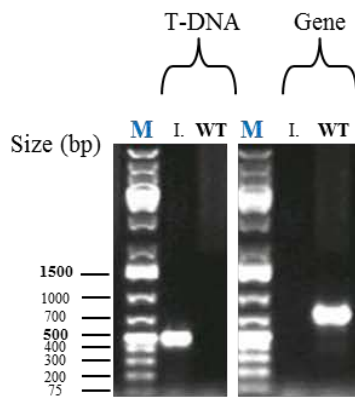

(E) *ggt2-1* (SAIL\_6\_G02)

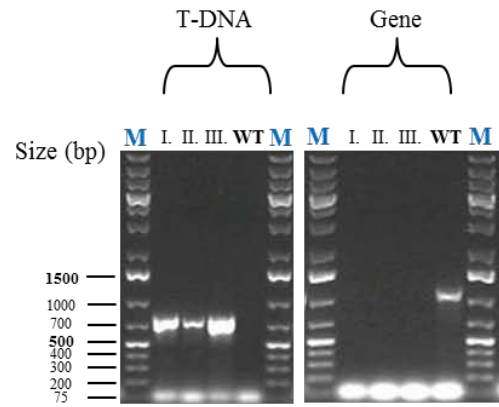

(F) *ggt3* (ET1113)

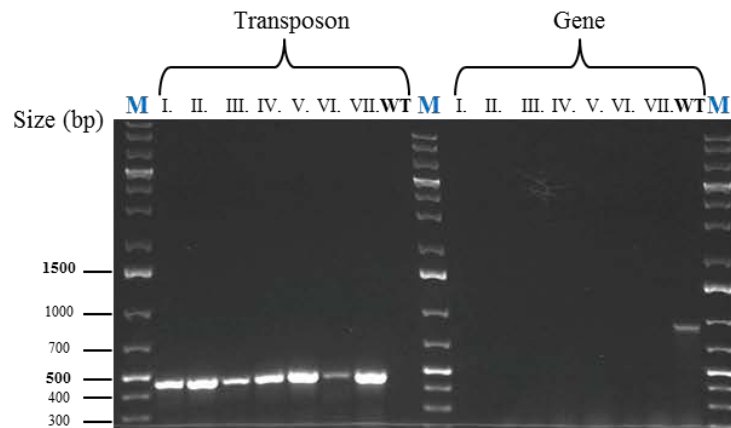

(G) *ggt4* (GT\_5\_57895)

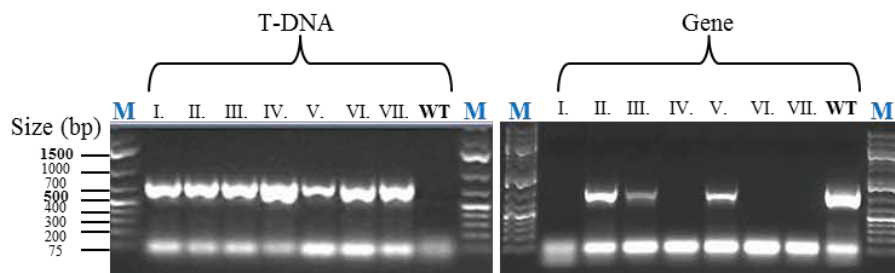



(H) *mrp1* (SALK\_017431)

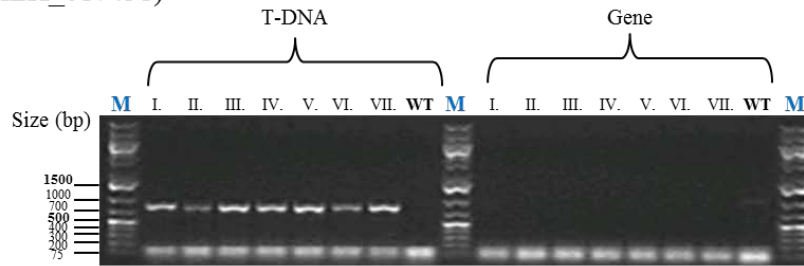

(I) *mrp2-2* (SALK\_127425)

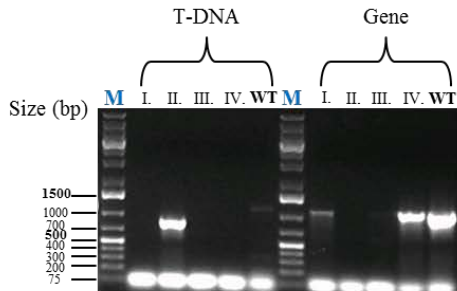

(J) *mrp3* (SALK\_044022)

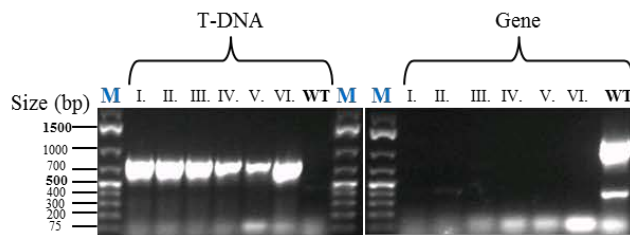

(K) *opt1-3* (SALK\_052985)

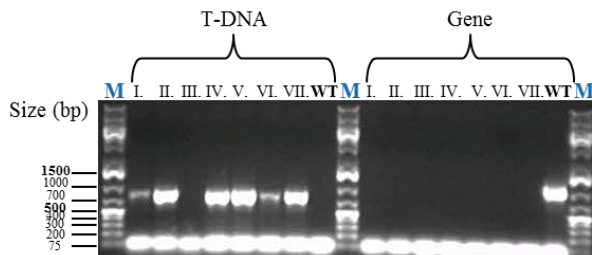

(L) *opt6* (SALK\_201534)

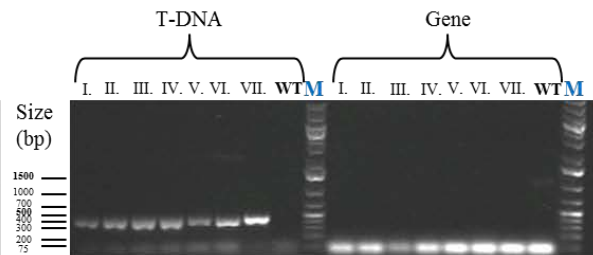

(M) *sultr1;2* (SM\_3.30250)

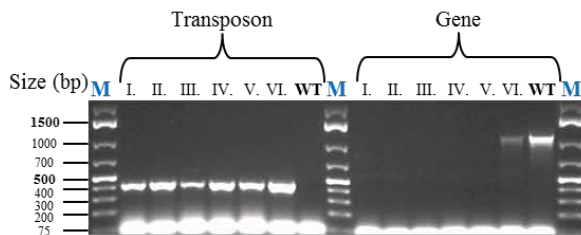

(N) *sultr4;1* (SALK\_103873)

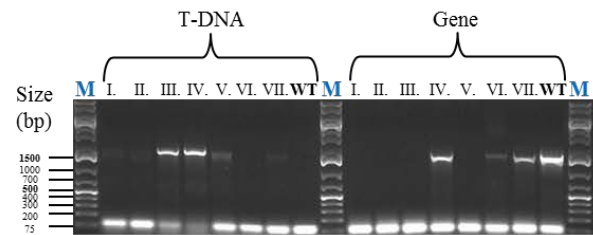

(O) *sultr4;2* (SALK\_103827)

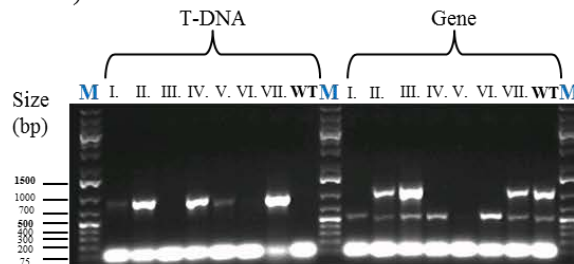

**Supplementary Table S1.** List of mutants used in our study. Mutants that are underlined in the table showed an increased susceptibility to the AITC treatment.

| <b>Mutant name</b>   | <b>Mutant ID</b> | <b>Source/<br/>Stock ID</b> | <b>Gene name</b>                          | <b>Gene ID</b>                      | <b>Description</b>                                                                                                                           | <b>Reference</b> |
|----------------------|------------------|-----------------------------|-------------------------------------------|-------------------------------------|----------------------------------------------------------------------------------------------------------------------------------------------|------------------|
| <u><i>cad2-1</i></u> |                  | Cobbett                     | <i>GSH1/CAD2</i>                          | AT4G23100                           | <i>cadmium sensitive 2</i> ; $\gamma$ -ECS/GSH1 is the first and rate-limiting enzyme of glutathione biosynthesis                            | 1                |
| <i>clt1clt2clt3</i>  |                  | Cobbett                     | <i>CLT1</i><br><i>CLT2</i><br><i>CLT3</i> | AT5G19380<br>AT4G24460<br>AT5G12170 | <i>chloroquine-resistance transporter-like transporters 1, 2, 3</i> ; transporters involved in glutathione transport from plastid to cytosol | 2                |
| <i>ggp1-1</i>        | GK-319F10        | N430598                     | <i>GGP1</i>                               | AT4G30530                           | <i><math>\gamma</math>-glutamyl peptidase 1</i> ; GGP1 hydrolyses $\gamma$ -glutamyl peptide bonds                                           | 3                |
| <i>ggt1-1</i>        | SAIL_1178_C01    | Ren                         | <i>GGT1</i>                               | AT4G39640                           | <i><math>\gamma</math>-glutamyl transpeptidase 1</i> ; GGT1 plays a role in the degradation of glutathione and its S-conjugates              | 4                |
| <i>ggt2-1</i>        | SAIL-6-G02       | N862221                     | <i>GGT2</i>                               | AT4G39650                           | <i><math>\gamma</math>-glutamyl transpeptidase 2</i> ; GGT2 is involved in the degradation of glutathione and its S-conjugates               | 5                |
| <i>ggt3</i>          | ET1113           | N26010                      | <i>GGT3</i>                               | AT1G69820                           | <i><math>\gamma</math>-glutamyl transpeptidase 3</i> ; GGT3 plays role in the degradation of glutathione and its S-conjugates                | 6                |
| <i>ggt4</i>          | GT_5_57895       | Grill                       | <i>GGT4</i>                               | AT4G29210                           | <i><math>\gamma</math>-glutamyl transpeptidase 4</i> ; GGT4 is involved in the degradation of glutathione and its S-conjugates               | 7                |
| <i>mrp1</i>          | SALK_017431      | N685353                     | <i>MRP1/ABCC1</i>                         | AT1G30400                           | <i>multidrug resistance-associated protein 1</i> ; glutathione S-conjugate pump                                                              | 8                |
| <i>mrp2-2</i>        | SALK_127425      | N627425                     | <i>MRP2/ABCC2</i>                         | AT2G34660                           | <i>multidrug resistance-associated protein 2</i> ; glutathione S-conjugate pump                                                              | 9                |
| <i>mrp3</i>          | SALK_044022      | N662277                     | <i>MRP3/ABCC3</i>                         | AT3G13080                           | <i>multidrug resistance-associated protein 3</i> ; glutathione S-conjugate and chlorophyll catabolite transporter                            | 10               |
| <u><i>nrc1</i></u>   |                  | Schroeder                   | <i>GSH1</i>                               | AT4G23100                           | <i>non response to cadmium 1</i> ; $\gamma$ -ECS/GSH1 is the first and rate-limiting enzyme of glutathione biosynthesis                      | 11               |
| <u><i>nrc2</i></u>   |                  | Schroeder                   | <i>GSH2</i>                               | AT5G27380                           | <i>non response to cadmium 2</i> ; glutathione synthetase is the second enzyme of glutathione biosynthesis                                   | 11               |

|                      |             |         |                            |                        |                                                                                                                       |    |
|----------------------|-------------|---------|----------------------------|------------------------|-----------------------------------------------------------------------------------------------------------------------|----|
| <i>opt1-3</i>        | SALK_052985 | N662479 | <i>OPT1</i>                | AT5G55930              | <i>oligopeptide transporter 1</i>                                                                                     | 12 |
| <i>opt6</i>          | SALK_201534 | N689065 | <i>OPT6</i>                | AT4G27730              | <i>oligopeptide transporter 6</i> ; involved in the transport of glutathione derivatives                              | 13 |
| <b><u>pad2-1</u></b> |             | N3804   | <i>GSH1</i>                | AT4G23100              | <i>phytoalexin deficient 2</i> ; $\gamma$ -ECS/GSH1 is the first and rate-limiting enzyme of glutathione biosynthesis | 14 |
| <i>pcs1pcs2</i>      |             | Grill   | <i>PCS1</i><br><i>PCS2</i> | AT5G44070<br>AT1G03980 | <i>phytochelatin synthase 1 and 2</i> ; synthesis of phytochelatins and catabolism of glutathione conjugates          | 15 |
| <i>sultr1;2</i>      | SM_3.30250  | N116961 | <i>SULTR1;2/SEL1</i>       | AT1G78000              | <i>sulfate transporter 1;2</i> ; high-affinity sulfate transporter                                                    | 16 |
| <i>sultr4;1</i>      | SALK_103873 | N673083 | <i>SULTR4;1</i>            | AT5G13550              | <i>sulfate transporter 4;1</i> ; low-affinity sulfate transporter                                                     | 17 |
| <i>sultr4;2</i>      | SALK_103827 | N676417 | <i>SULTR4;2</i>            | AT3G12520              | <i>sulfate transporter 4;2</i> ; low-affinity sulfate transporter                                                     | 18 |
| <b><u>zir1</u></b>   |             | Yeh     | <i>GSH1</i>                | AT4G23100              | <i>zinc tolerance induced by iron 1</i> ; ECS/GSH1 is the first and rate-limiting enzyme of glutathione biosynthesis  | 19 |

## References

- 1 Cobbett, C. S., May, M. J., Howden, R. & Rolls, B. The glutathione-deficient, cadmium-sensitive mutant, *cad2-1*, of *Arabidopsis thaliana* is deficient in  $\gamma$ -glutamylcysteine synthetase. *Plant J.* **16**, 73-78, (1998).
- 2 Maughan, S. C. *et al.* Plant homologs of the *Plasmodium falciparum* chloroquine-resistance transporter, PfCRT, are required for glutathione homeostasis and stress responses. *Proc. Natl. Acad. Sci. U.S.A.* **107**, 2331-2336, (2010).
- 3 Geu-Flores, F. *et al.* Cytosolic  $\gamma$ -glutamyl peptidases process glutathione conjugates in the biosynthesis of glucosinolates and camalexin in *Arabidopsis*. *Plant Cell* **23**, 2456-2469, (2011).
- 4 Su, T. *et al.* Glutathione-indole-3-acetonitrile is required for camalexin biosynthesis in *Arabidopsis thaliana*. *Plant Cell* **23**, 364-380, (2011).
- 5 Ohkama-Ohtsu, N. *et al.* Characterization of the extracellular  $\gamma$ -glutamyl transpeptidases, GGT1 and GGT2, in *Arabidopsis*. *Plant J.* **49**, 865-877, (2007).
- 6 Martin, M. N., Saladores, P. H., Lambert, E., Hudson, A. O. & Leustek, T. Localization of members of the  $\gamma$ -glutamyl transpeptidase family identifies sites of glutathione and glutathione S-conjugate hydrolysis. *Plant Physiol.* **144**, 1715-1732, (2007).
- 7 Blum, R., Meyer, K. C., Wunschmann, J., Lenzian, K. J. & Grill, E. Cytosolic action of phytochelatin synthase. *Plant Physiol.* **153**, 159-169, (2010).
- 8 Song, W. Y. *et al.* Arsenic tolerance in *Arabidopsis* is mediated by two ABC-type phytochelatin transporters. *Proc. Natl. Acad. Sci. U.S.A.* **107**, 21187-21192, (2010).

- 9 Frelet-Barrand, A. *et al.* Comparative Mutant Analysis of Arabidopsis ABCC-Type ABC Transporters: AtMRP2 Contributes to Detoxification, Vacuolar Organic Anion Transport and Chlorophyll Degradation. *Plant Cell Physiol.* **49**, 557-569, (2008).
- 10 Tommasini, R. *et al.* An ABC-transporter of *Arabidopsis thaliana* has both glutathione-conjugate and chlorophyll catabolite transport activity. *Plant J.* **13**, 773-780, (1998).
- 11 Jobe, T. O. *et al.* Feedback inhibition by thiols outranks glutathione depletion: a luciferase-based screen reveals glutathione-deficient  $\gamma$ -ECS and glutathione synthetase mutants impaired in cadmium-induced sulfate assimilation. *Plant J.* **70**, 783-795, (2012).
- 12 Hofstetter, S. S., Dudnik, A., Widmer, H. & Dudler, R. Arabidopsis YELLOW STRIPE-LIKE7 (YSL7) and YSL8 transporters mediate uptake of *Pseudomonas* virulence factor syringolin A into plant cells. *Mol. Plant-Microbe Interact.* **26**, 1302-1311, (2013).
- 13 Cagnac, O., Bourbouloux, A., Chakrabarty, D., Zhang, M.-Y. & Delrot, S. AtOPT6 transports glutathione derivatives and is induced by primisulfuron. *Plant Physiol.* **135**, 1378-1387, (2004).
- 14 Glazebrook, J. & Ausubel, F. M. Isolation of phytoalexin-deficient mutants of *Arabidopsis thaliana* and characterization of their interactions with bacterial pathogens. *Proc. Natl. Acad. Sci. U.S.A.* **91**, 8955-8959, (1994).
- 15 Blum, R. *et al.* Function of phytochelatin synthase in catabolism of glutathione-conjugates. *Plant J.* **49**, 740-749, (2007).
- 16 Shibagaki, N. *et al.* Selenate-resistant mutants of *Arabidopsis thaliana* identify Sultr1;2, a sulfate transporter required for efficient transport of sulfate into roots. *Plant J.* **29**, 475-486, (2002).
- 17 Zuber, H. *et al.* Sultr4;1 mutant seeds of *Arabidopsis* have an enhanced sulphate content and modified proteome suggesting metabolic adaptations to altered sulphate compartmentalization. *BMC Plant Biol.* **10**, 1-13, (2010).
- 18 El Kassis, E. *et al.* Characterization of a selenate-resistant *Arabidopsis* mutant. Root growth as a potential target for selenate toxicity. *Plant Physiol.* **143**, 1231-1241, (2007).
- 19 Shanmugam, V., Tsednee, M. & Yeh, K.-C. ZINC TOLERANCE INDUCED BY IRON 1 reveals the importance of glutathione in the cross-homeostasis between zinc and iron in *Arabidopsis thaliana*. *Plant J.* **69**, 1006-1017, (2012).

**Supplementary Table S2.** List of primers used for validation of the mutant lines tested in our study. (For: forward gene specific primer, Rev: reverse gene specific primer; T-DNA: primer annealing on T-DNA)

| Mutant name     | Primer sequence (5'-3')                    |
|-----------------|--------------------------------------------|
| <i>cad2-1</i>   | For GGAGGATATACCCATCATGC                   |
|                 | Rev GGTGTAAAGCAAGACCAGC                    |
| <i>ggp1-1</i>   | For AGAATGATGATTGGATCCTTAAGC               |
|                 | Rev GATCGCTATGCTATCAGGAATCTC               |
|                 | T-DNA ATAATAACGCTGCGGACATCTACATTTT         |
| <i>ggt1-1</i>   | For GACTTGGCCTCAACGTATACATC                |
|                 | Rev CGCGAGACTTAACAATACTTTGC                |
|                 | T-DNA TAGCATCTGAATTTTCATAACCAATCTCGATACAC  |
| <i>ggt2-1</i>   | For CTCCCACCATTGTACTCAAGG                  |
|                 | Rev CTAGAGGCGGAGTATCCAAGG                  |
|                 | T-DNA TAGCATCTGAATTTTCATAACCAATCTCGATACAC  |
| <i>ggt3</i>     | For GTATCACTTCTTGGTCACACTGC                |
|                 | Rev GATCAAATAACTTACCTGCCACC                |
|                 | T-DNA CCGTTTTGTATATCCCCTTCCGT              |
| <i>ggt4</i>     | For AATCGGTGGTGGTTCTTTCTTGATT              |
|                 | Rev TGTTGAGAAATCATCCATCTCGTTG              |
|                 | T-DNA ACCCGACCGGATCGTATCGGT                |
| <i>mrp1</i>     | For ATTGGGGTTTTATGTGAAGC                   |
|                 | Rev ACTTCACTGTATCCATTGCCG                  |
|                 | T-DNA TGGTTCACGTAGTGGGCCATCG               |
| <i>mrp2-2</i>   | For GCTTTTCTGCGTTTGTAGTGG                  |
|                 | Rev TTTTCCAAGCATAACACCTG                   |
|                 | T-DNA TGGTTCACGTAGTGGGCCATCG               |
| <i>mrp3</i>     | For AAGTCAGCAATTGCTTTGGAG                  |
|                 | Rev AGGGAGCCTTTTATGCTCAC                   |
|                 | T-DNA TGGTTCACGTAGTGGGCCATCG               |
| <i>nrc1</i>     | For CAAAGCATTTCACTTGAACC                   |
|                 | Rev TTCTCATAATGTCGTATCTCCC                 |
| <i>nrc2</i>     | For TGCTAGGCTGCTTATTGAGG                   |
|                 | Rev TCCCTCACATCATCTCCATAG                  |
| <i>opt1-3</i>   | For AAAACCAAAGAAAACGGATCC                  |
|                 | Rev GACTATTACCCACAACAACAAAATG              |
|                 | T-DNA TGGTTCACGTAGTGGGCCATCG               |
| <i>opt6</i>     | For AAAATTCAAACATTACAAGCCATG               |
|                 | Rev GATAGGGAAGGTCTTGGCATC                  |
|                 | T-DNA TGGTTCACGTAGTGGGCCATCG               |
| <i>pad2-1</i>   | For TGATATGATCAGGAAGTTTCG                  |
|                 | Rev CAGTGTCTGTCCATATGTGG                   |
| <i>pcs1pcs2</i> | For <sub>pcs1</sub> CGAATCCACTAACGAATCTTCC |
|                 | Rev <sub>pcs1</sub> TTGATTCATCAAACCACCTCC  |
|                 | For <sub>pcs2</sub> GGTTACGAATTATTGATAGCC  |
|                 | Rev <sub>pcs2</sub> CTCTGTTCTTCGAATCTCAGC  |
|                 | T-DNA ATGGCGAAATCAAGGCATC                  |
| <i>sultr1;2</i> | For ATTGGTGCATCATTCTTGACC                  |
|                 | Rev TCCGAGAACTGCAGTTCTAGG                  |
|                 | T-DNA CTTATTTTCAGTAAGAGTGTGGGGTTTTGG       |
| <i>sultr4;1</i> | For AGCTAAGACTGGCCTATCAGG                  |
|                 | Rev CGTTTTGGTGAATCTTGCTC                   |
|                 | T-DNA TGGTTCACGTAGTGGGCCATCG               |
| <i>sultr4;2</i> | For CCAGCAGCATGTATCGGTATC                  |
|                 | Rev ACCGTATATTGGTTGAAGCCC                  |
|                 | T-DNA TGGTTCACGTAGTGGGCCATCG               |
| <i>zir1</i>     | For CTGTACTGGAATGACATTTCCGG                |
|                 | Rev AGTCAGCTGTCAGATCCAGG                   |
